# Supplementary material for: microRNA Expression Profile in the Vitreous of Proliferative Diabetic Retinopathy Patients and Differences from Patients Treated with Anti-VEGF Therapy
Source: PubMed Central journal article supplement — Transl Vis Sci Technol. 2020 May 19;9(6):16. doi: 10.1167/tvst.9.6.16 (PMC7409134; doi:10.1167/tvst.9.6.16), 2020-05-19
Supplement: tvst-9-6-16_s001.pdf [file tvst-9-6-16_s001.pdf]

## Supplementary information

**Supplemental Table 1.** Primers used for single qPCR assays.

| miRNA           | Cat No     | Assay ID   | System      | Company       |
|-----------------|------------|------------|-------------|---------------|
| hsa-miR-20a-5p  | YP00204292 |            | miRCURY LNA | Qiagen        |
| hsa-miR-23b-3p  | YP00204790 |            | miRCURY LNA | Qiagen        |
| hsa-miR-142-3p  | YP00204291 |            | miRCURY LNA | Qiagen        |
| hsa-miR-185-5p  | YP00206037 |            | miRCURY LNA | Qiagen        |
| hsa-miR-199a-5p | YP00204494 |            | miRCURY LNA | Qiagen        |
| hsa-miR-223-3p  | YP00205986 |            | miRCURY LNA | Qiagen        |
| hsa-miR-326     | YP00204512 |            | miRCURY LNA | Qiagen        |
| hsa-miR-362-5p  | YP00204618 |            | miRCURY LNA | Qiagen        |
| hsa-miR-662     | YP00204180 |            | miRCURY LNA | Qiagen        |
| cel-miR-39-3p   | YP00203952 |            | miRCURY LNA | Qiagen        |
| UniSp6          | YP00203954 |            | miRCURY LNA | Qiagen        |
| cel-miR-55-3p   | A25576     | 478295_mir | TaqMan      | Thermo Fisher |
| hsa-miR-223-3p  | A25576     | 477983_mir | TaqMan      | Thermo Fisher |
| hsa-miR-326     | A25576     | 478027_mir | TaqMan      | Thermo Fisher |
| hsa-miR-362-5p  | A25576     | 478059_mir | TaqMan      | Thermo Fisher |
| hsa-miR-662     | A25576     | 479145_mir | TaqMan      | Thermo Fisher |

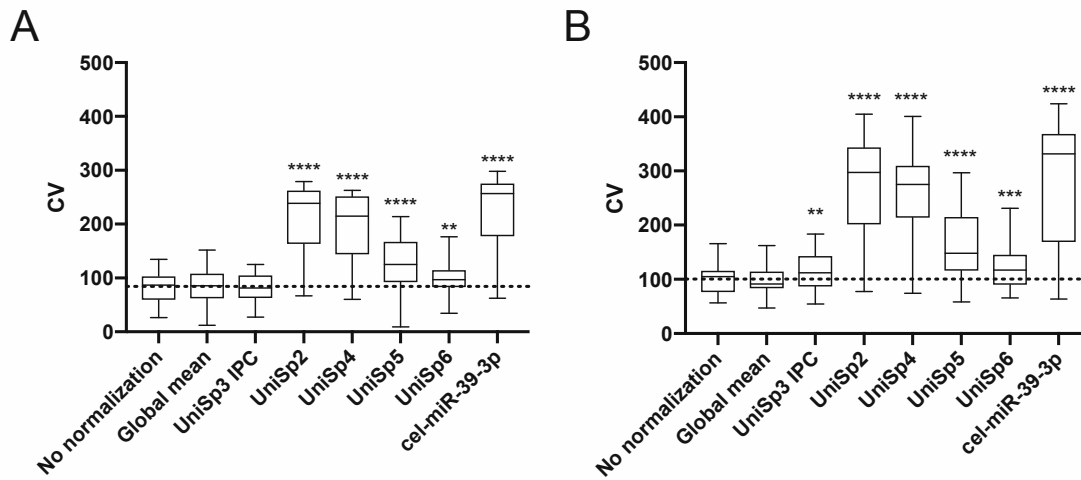

**Supplemental Figure 1. Contribution of different normalization methods on sample variance.** Of 33 miRNAs, the coefficient of variation (CV) in no normalized (“No normalization”) and normalized qPCR values from control samples only (n = 10) (A) or all 20 samples (B) was calculated. Box whisker plots are shown, representing median values with minimum and maximum values. The dotted line indicates the mean CV of all miRNAs without normalization (non-normalized values: 84.1% in B and 103.1% in C). Compared to non-normalized values, most normalization methods significantly increased CV (\*\*P < 0.01, \*\*\* P < 0.001, \*\*\*\* P < 0.0001), as determined by paired t-tests.

**Supplemental Table 2. miRNAs regularly expressed in the vitreous of control and PDR patients.** miRNAs found to be expressed in  $\geq 70\%$  of all samples in one condition were considered to be regularly expressed and are marked in **bold** (miRNAs regularly expressed in Control: 24; miRNAs regularly expressed in PDR: 26).

| miRNA           | Control     | PDR         |
|-----------------|-------------|-------------|
| hsa-miR-142-3p  | 30%         | <b>80%</b>  |
| hsa-miR-149-5p  | <b>70%</b>  | 60%         |
| hsa-miR-185-5p  | 20%         | <b>70%</b>  |
| hsa-miR-197-3p  | 60%         | <b>70%</b>  |
| hsa-miR-199a-5p | <b>70%</b>  | 20%         |
| hsa-miR-204-5p  | <b>70%</b>  | <b>70%</b>  |
| hsa-miR-20a-5p  | 10%         | <b>70%</b>  |
| hsa-miR-21-5p   | <b>80%</b>  | <b>80%</b>  |
| hsa-miR-222-3p  | <b>90%</b>  | <b>80%</b>  |
| hsa-miR-223-3p  | 50%         | <b>80%</b>  |
| hsa-miR-23a-3p  | 50%         | <b>80%</b>  |
| hsa-miR-23b-3p  | 20%         | <b>70%</b>  |
| hsa-miR-320a    | <b>70%</b>  | <b>80%</b>  |
| hsa-miR-324-3p  | <b>90%</b>  | <b>90%</b>  |
| hsa-miR-326     | <b>100%</b> | 60%         |
| hsa-miR-329-3p  | <b>100%</b> | <b>100%</b> |
| hsa-miR-345-5p  | <b>90%</b>  | <b>90%</b>  |
| hsa-miR-361-5p  | <b>100%</b> | <b>100%</b> |
| hsa-miR-362-5p  | <b>100%</b> | <b>100%</b> |
| hsa-miR-373-3p  | <b>70%</b>  | <b>70%</b>  |
| hsa-miR-376c-3p | <b>80%</b>  | 50%         |
| hsa-miR-454-3p  | <b>80%</b>  | <b>80%</b>  |
| hsa-miR-491-5p  | <b>80%</b>  | <b>100%</b> |
| hsa-miR-502-5p  | <b>80%</b>  | <b>80%</b>  |
| hsa-miR-509-3p  | <b>80%</b>  | 60%         |
| hsa-miR-595     | <b>70%</b>  | <b>70%</b>  |
| hsa-miR-598-3p  | <b>100%</b> | <b>100%</b> |
| hsa-miR-615-3p  | <b>80%</b>  | <b>70%</b>  |
| hsa-miR-662     | 0%          | <b>70%</b>  |
| hsa-miR-663a    | <b>90%</b>  | <b>90%</b>  |
| hsa-miR-760     | <b>70%</b>  | <b>100%</b> |
| hsa-miR-765     | 60%         | 50%         |
| hsa-miR-877-5p  | <b>80%</b>  | 60%         |

**Supplemental Table 3.** miRNA levels in vitreous of control (CON) and PDR patients in the three cohorts.

| miRNA           | CON (N = 10) |        |       |        | PDR (N = 10) |        |       |        | Fold change | P-value |
|-----------------|--------------|--------|-------|--------|--------------|--------|-------|--------|-------------|---------|
|                 | % of samples | median | 1st Q | 3rd Q  | % of samples | median | 1st Q | 3rd Q  |             |         |
| hsa-let-7a-5p   | 20 %         | 12.27  | 6.93  | 17.61  | 60%          | 21.89  | 14.86 | 30.34  | 1.78        | 0.0549  |
| hsa-let-7b-5p   | 60 %         | 13.45  | 6.19  | 17.21  | 60%          | 22.32  | 9.74  | 42.82  | 1.66        | 0.5580  |
| hsa-let-7c-5p   | 60 %         | 5.89   | 3.27  | 7.87   | 60%          | 10.26  | 5.55  | 15.39  | 1.74        | 0.7846  |
| hsa-miR-101-3p  | -            | -      | -     | -      | 30%          | 10.99  | 6.74  | 32.55  | -           | 0.0779  |
| hsa-miR-124-3p  | 30 %         | 12.12  | 7.28  | 13.30  | 40%          | 6.14   | 2.82  | 175.36 | 0.51        | 0.7562  |
| hsa-miR-125a-5p | 40 %         | 22.67  | 18.65 | 35.55  | 10%          | 1.82   | 1.82  | 1.82   | 0.08        | 0.1012  |
| hsa-miR-125b-5p | 20 %         | 34.11  | 25.49 | 42.73  | 50%          | 36.88  | 36.33 | 63.75  | 1.08        | 0.1692  |
| hsa-miR-128-3p  | 40 %         | 1.28   | 1.19  | 1.77   | 20%          | 4.04   | 2.77  | 5.32   | 3.15        | 0.5447  |
| hsa-miR-130a-3p | 10 %         | 2.92   | 2.92  | 2.92   | 40%          | 9.31   | 4.61  | 14.49  | 3.19        | 0.1236  |
| hsa-miR-140-3p  | 60 %         | 19.60  | 2.67  | 54.24  | 50%          | 17.62  | 2.65  | 49.42  | 0.90        | 0.7815  |
| hsa-miR-142-3p  | 30 %         | 7.79   | 4.90  | 15.71  | 80%          | 19.01  | 16.25 | 32.62  | 2.44        | 0.0125  |
| hsa-miR-144-3p  | 20 %         | 15.72  | 14.31 | 17.13  | 40%          | 3.10   | 1.70  | 7.60   | 0.20        | 0.5447  |
| hsa-miR-149-5p  | 70 %         | 22.53  | 1.38  | 36.87  | 60%          | 13.10  | 1.75  | 56.56  | 0.58        | 0.9078  |
| hsa-miR-15a-5p  | 10 %         | 31.73  | 31.73 | 31.73  | 40%          | 18.59  | 11.32 | 30.92  | 0.59        | 0.1799  |
| hsa-miR-16-5p   | 40 %         | 26.26  | 17.80 | 41.70  | 50%          | 24.70  | 12.15 | 104.81 | 0.94        | 0.6490  |
| hsa-miR-185-5p  | 20 %         | 46.64  | 38.74 | 54.53  | 70%          | 62.17  | 21.90 | 99.20  | 1.33        | 0.0349  |
| hsa-miR-187-5p  | 50 %         | 10.70  | 1.89  | 16.94  | 20%          | 6.16   | 4.28  | 8.05   | 0.58        | 0.1692  |
| hsa-miR-191-5p  | 50 %         | 13.24  | 3.25  | 19.88  | 30%          | 1.87   | 1.40  | 3.75   | 0.14        | 0.2323  |
| hsa-miR-193a-5p | -            | -      | -     | -      | 40%          | 3.16   | 1.76  | 4.56   | -           | 0.0350  |
| hsa-miR-197-3p  | 60 %         | 3.28   | 2.22  | 22.81  | 70%          | 3.09   | 2.46  | 20.04  | 0.94        | 0.6710  |
| hsa-miR-199a-5p | 70 %         | 17.42  | 3.10  | 18.49  | 20%          | 0.97   | 0.96  | 0.98   | 0.06        | 0.0091  |
| hsa-miR-202-3p  | 40 %         | 4.57   | 2.42  | 11.15  | -            | -      | -     | -      | -           | 0.0350  |
| hsa-miR-204-5p  | 70 %         | 29.96  | 27.38 | 56.09  | 70%          | 29.53  | 7.34  | 49.33  | 0.99        | 0.5918  |
| hsa-miR-205-5p  | 60 %         | 14.04  | 6.98  | 20.50  | 40%          | 20.44  | 16.73 | 21.30  | 1.46        | 0.5447  |
| hsa-miR-206     | 20 %         | 4.65   | 3.69  | 5.60   | 50%          | 1.29   | 0.97  | 5.68   | 0.28        | 0.2675  |
| hsa-miR-20a-5p  | 10 %         | 3.93   | 3.93  | 3.93   | 70%          | 2.66   | 1.77  | 30.18  | 0.68        | 0.0133  |
| hsa-miR-210-3p  | 10 %         | 1.58   | 1.58  | 1.58   | 50%          | 20.02  | 4.85  | 43.31  | 12.65       | 0.0403  |
| hsa-miR-211-5p  | 40 %         | 44.88  | 18.31 | 68.41  | 50%          | 18.79  | 12.53 | 21.23  | 0.42        | 0.9670  |
| hsa-miR-21-5p   | 80 %         | 12.67  | 7.81  | 23.71  | 80%          | 125.91 | 35.35 | 275.89 | 9.93        | 0.0878  |
| hsa-miR-222-3p  | 90 %         | 7.14   | 1.76  | 24.47  | 80%          | 4.52   | 1.93  | 8.97   | 0.63        | 0.4720  |
| hsa-miR-223-3p  | 50 %         | 34.58  | 31.45 | 35.64  | 80%          | 61.42  | 33.18 | 87.75  | 1.78        | 0.0407  |
| hsa-miR-23a-3p  | 50 %         | 15.44  | 13.17 | 16.12  | 80%          | 17.38  | 14.44 | 34.99  | 1.13        | 0.0822  |
| hsa-miR-23b-3p  | 20 %         | 2.47   | 1.99  | 2.95   | 70%          | 9.18   | 7.83  | 13.25  | 3.71        | 0.0116  |
| hsa-miR-24-3p   | 20 %         | 36.06  | 24.55 | 47.58  | 60%          | 26.68  | 22.86 | 30.75  | 0.74        | 0.0962  |
| hsa-miR-25-3p   | -            | -      | -     | -      | 40%          | 15.74  | 10.98 | 21.09  | -           | 0.0350  |
| hsa-miR-27b-3p  | 30 %         | 4.26   | 3.53  | 10.05  | 50%          | 1.04   | 1.01  | 1.18   | 0.24        | 0.6697  |
| hsa-miR-30c-5p  | 10 %         | 16.58  | 16.58 | 16.58  | 40%          | 24.63  | 16.70 | 29.89  | 1.49        | 0.1236  |
| hsa-miR-31-5p   | 20 %         | 4.92   | 3.92  | 5.93   | 50%          | 2.62   | 2.32  | 2.76   | 0.53        | 0.3517  |
| hsa-miR-320a    | 70 %         | 15.44  | 7.28  | 20.25  | 80%          | 31.31  | 15.32 | 61.75  | 2.03        | 0.1375  |
| hsa-miR-324-3p  | 90 %         | 4.64   | 4.57  | 21.25  | 90%          | 4.45   | 2.88  | 14.98  | 0.96        | 0.5452  |
| hsa-miR-326     | 100 %        | 14.31  | 9.22  | 45.24  | 60%          | 7.92   | 3.00  | 25.14  | 0.55        | 0.0168  |
| hsa-miR-329-3p  | 100 %        | 12.88  | 9.71  | 21.47  | 100%         | 7.06   | 3.40  | 10.46  | 0.55        | 0.0892  |
| hsa-miR-345-5p  | 90 %         | 18.52  | 6.20  | 23.05  | 90%          | 15.53  | 8.13  | 32.42  | 0.84        | 0.5452  |
| hsa-miR-361-5p  | 100 %        | 257.65 | 48.89 | 513.75 | 100%         | 77.26  | 25.16 | 210.62 | 0.30        | 0.3930  |
| hsa-miR-362-5p  | 100 %        | 3.89   | 2.59  | 5.42   | 100%         | 7.50   | 4.26  | 11.62  | 1.93        | 0.0433  |
| hsa-miR-373-3p  | 70 %         | 71.44  | 36.54 | 80.34  | 70%          | 10.40  | 7.01  | 43.29  | 0.15        | 0.4436  |
| hsa-miR-373-5p  | 10 %         | 2.36   | 2.36  | 2.36   | 40%          | 2.57   | 1.43  | 4.73   | 1.09        | 0.1497  |
| hsa-miR-376c-3p | 80 %         | 3.49   | 1.95  | 4.91   | 50%          | 2.22   | 2.03  | 3.66   | 0.64        | 0.1320  |
| hsa-miR-412-3p  | 40 %         | 3.78   | 1.42  | 7.00   | 40%          | 1.12   | 1.07  | 1.63   | 0.30        | 0.6389  |
| hsa-miR-451a    | 20 %         | 18.30  | 17.16 | 19.44  | 40%          | 61.56  | 45.51 | 252.99 | 3.36        | 0.2083  |
| hsa-miR-454-3p  | 80 %         | 34.02  | 14.82 | 53.33  | 80%          | 13.61  | 1.55  | 30.38  | 0.40        | 0.3057  |
| hsa-miR-485-3p  | 30 %         | 32.39  | 19.47 | 48.32  | 20%          | 33.42  | 28.91 | 37.92  | 1.03        | 0.6548  |
| hsa-miR-491-5p  | 80 %         | 72.58  | 25.13 | 81.12  | 100%         | 8.84   | 4.60  | 20.11  | 0.12        | 0.3445  |
| hsa-miR-495-3p  | 30 %         | 1.04   | 1.03  | 1.16   | 50%          | 1.20   | 1.10  | 1.52   | 1.15        | 0.3059  |
| hsa-miR-502-5p  | 80 %         | 8.28   | 3.05  | 27.98  | 80%          | 7.33   | 3.87  | 10.26  | 0.89        | 0.7906  |
| hsa-miR-509-3p  | 80 %         | 42.97  | 25.63 | 104.57 | 60%          | 28.42  | 24.46 | 61.60  | 0.66        | 0.3010  |
| hsa-miR-519d-3p | 20 %         | 5.97   | 4.94  | 6.99   | -            | -      | -     | -      | -           | 0.1681  |
| hsa-miR-523-3p  | 40 %         | 45.07  | 29.00 | 60.12  | 40%          | 10.74  | 5.41  | 17.78  | 0.24        | 0.5792  |
| hsa-miR-524-5p  | 50 %         | 24.95  | 4.22  | 32.73  | 30%          | 30.65  | 17.42 | 35.82  | 1.23        | 0.4426  |
| hsa-miR-542-5p  | 60 %         | 46.90  | 28.21 | 76.21  | 40%          | 39.67  | 19.12 | 55.40  | 0.85        | 0.3530  |
| hsa-miR-545-3p  | 60 %         | 17.43  | 12.25 | 29.74  | 60%          | 5.67   | 3.27  | 18.55  | 0.33        | 0.4581  |
| hsa-miR-595     | 70 %         | 5.89   | 3.66  | 10.72  | 70%          | 3.16   | 2.32  | 4.20   | 0.54        | 0.4905  |
| hsa-miR-598-3p  | 100 %        | 23.19  | 16.93 | 40.95  | 100%         | 36.82  | 28.11 | 71.80  | 1.59        | 0.2799  |
| hsa-miR-615-3p  | 80 %         | 4.11   | 2.36  | 8.03   | 70%          | 2.95   | 2.42  | 3.29   | 0.72        | 0.3811  |
| hsa-miR-642a-5p | 40 %         | 9.72   | 6.82  | 11.44  | 20%          | 2.83   | 2.11  | 3.56   | 0.29        | 0.2440  |
| hsa-miR-662     | -            | -      | -     | -      | 70%          | 7.23   | 2.49  | 12.94  | -           | 0.0022  |
| hsa-miR-663a    | 90 %         | 11.50  | 2.19  | 26.36  | 90%          | 3.40   | 1.69  | 24.03  | 0.30        | 1.0000  |
| hsa-miR-671-5p  | 40 %         | 3.94   | 1.61  | 6.27   | 20%          | 12.05  | 6.80  | 17.31  | 3.06        | 0.4283  |
| hsa-miR-760     | 70 %         | 30.77  | 23.29 | 46.57  | 100%         | 20.01  | 11.54 | 35.58  | 0.65        | 0.7910  |

|                |      |       |       |       |     |       |       |        |      |        |
|----------------|------|-------|-------|-------|-----|-------|-------|--------|------|--------|
| hsa-miR-765    | 60 % | 21.12 | 11.75 | 24.24 | 50% | 24.74 | 22.18 | 26.89  | 1.17 | 0.9684 |
| hsa-miR-766-3p | 60 % | 3.27  | 1.61  | 4.79  | 60% | 2.91  | 2.22  | 4.71   | 0.89 | 0.9689 |
| hsa-miR-877-5p | 80 % | 33.10 | 15.39 | 49.95 | 60% | 32.95 | 7.78  | 47.20  | 1.00 | 0.3383 |
| hsa-miR-92a-3p | -    | -     | -     | -     | 30% | 48.53 | 28.24 | 184.72 | -    | 0.0779 |
| hsa-miR-934    | 40 % | 7.22  | 2.84  | 17.83 | 30% | 3.97  | 3.67  | 13.81  | 0.55 | 0.7562 |
| hsa-miR-940    | 40 % | 6.42  | 5.02  | 12.23 | 50% | 6.21  | 1.68  | 15.60  | 0.97 | 0.8361 |
| hsa-miR-99a-3p | 40 % | 20.62 | 11.65 | 27.91 | 10% | 42.11 | 42.11 | 42.11  | 2.04 | 0.2143 |

#### Confirmation cohort

| miRNA           | CON (N = 17) |        |        | PDR (N = 11) |       |         | Fold change | P-value |
|-----------------|--------------|--------|--------|--------------|-------|---------|-------------|---------|
|                 | median       | 1st Q  | 3rd Q  | median       | 1st Q | 3rd Q   |             |         |
| hsa-miR-142-3p  | 22.62        | 19.64  | 28.75  | 83.36        | 32.89 | 129.16  | 3.69        | 0.0004  |
| hsa-miR-185-5p  | 55.34        | 48.24  | 62.44  | 428.90       | 79.43 | 1300.37 | 7.75        | 0.0004  |
| hsa-miR-199a-5p | 5.82         | 4.38   | 6.71   | 6.64         | 2.58  | 7.45    | 1.14        | 0.2088  |
| hsa-miR-20a-5p  | 21.95        | 12.61  | 26.59  | 63.33        | 27.30 | 1318.33 | 2.89        | 0.001   |
| hsa-miR-223-3p  | 146.16       | 44.28  | 368.09 | 92.59        | 47.02 | 621.54  | 0.63        | 0.3138  |
| hsa-miR-23b-3p  | 9.17         | 7.06   | 15.46  | 44.91        | 21.71 | 63.47   | 4.90        | 0.0034  |
| hsa-miR-326     | 204.35       | 103.23 | 305.47 | 96.66        | 36.48 | 538.56  | 0.47        | 0.0013  |
| hsa-miR-362-5p  | 21.52        | 17.12  | 29.92  | 27.92        | 24.14 | 40.24   | 1.30        | 0.0487  |

#### Anti-VEGF cohort

| miRNA          | Treated (N = 17) |       |         | Untreated (N = 16) |       |         | Fold change | P-value |
|----------------|------------------|-------|---------|--------------------|-------|---------|-------------|---------|
|                | median           | 1st Q | 3rd Q   | median             | 1st Q | 3rd Q   |             |         |
| hsa-miR-142-3p | 60.17            | 30.72 | 145.52  | 58.23              | 25.49 | 115.36  | 0.97        | 0.1697  |
| hsa-miR-185-5p | 40.66            | 33.83 | 112.58  | 119.64             | 51.05 | 1133.17 | 2.94        | 0.3772  |
| hsa-miR-20a-5p | 39.77            | 23.36 | 126.84  | 56.96              | 26.77 | 167.04  | 1.43        | 0.2433  |
| hsa-miR-23b-3p | 12.16            | 9.52  | 20.63   | 40.12              | 17.22 | 62.17   | 3.30        | 0.0203  |
| hsa-miR-326    | 223.57           | 0.89  | 1309.85 | 395.81             | 89.83 | 1722.49 | 1.77        | 0.4218  |
| hsa-miR-362-5p | 36.91            | 28.82 | 183.22  | 31.63              | 24.55 | 55.09   | 0.86        | 0.1646  |

Data are presented in absolute amounts with 1st and 3rd quartile values.

The Mann-Whitney U test was used to assess statistical differences between groups.
